# Supplementary material for: The Terminal Oxidase Cytochrome bd Promotes Sulfide-resistant Bacterial Respiration and Growth
Source: PubMed Central journal article supplement (PMC4815019; doi:10.1038/srep23788), 2016-03-31
Supplement: srep23788-s1.pdf [file srep23788-s1.pdf]

## SUPPLEMENTARY INFORMATION

### “The Terminal Oxidase Cytochrome *bd* Promotes Sulfide-resistant Bacterial Respiration and Growth”

Elena Forte, Vitaliy B. Borisov, Micol Falabella, Henrique G. Colaço, Mariana Tinajero-Trejo, Robert K. Poole, João B. Vicente, Paolo Sarti, Alessandro Giuffrè

#### Figure S1: H<sub>2</sub>S consumption by the *Entamoeba histolytica* O-acetylserine sulfhydrylase (*EhOASS*)

(A) purified recombinant *EhOASS* elutes as dimer of ~38 kDa monomers, as judged by size-exclusion chromatography. (B) amperometric measurement of H<sub>2</sub>S consumption by *EhOASS*. T = 20 °C. Buffer: 100 mM HEPES pH 7.0 containing 260 U/mL catalase and 100 μM EDTA. After three sequential additions of 0.75 μM H<sub>2</sub>S, O-acetylserine (100 μM) was added and the reaction was initiated by addition of *EhOASS* (9 nM). Under the tested conditions, *EhOASS* efficiently consumes H<sub>2</sub>S with an apparent turnover number of 35 s<sup>-1</sup>.

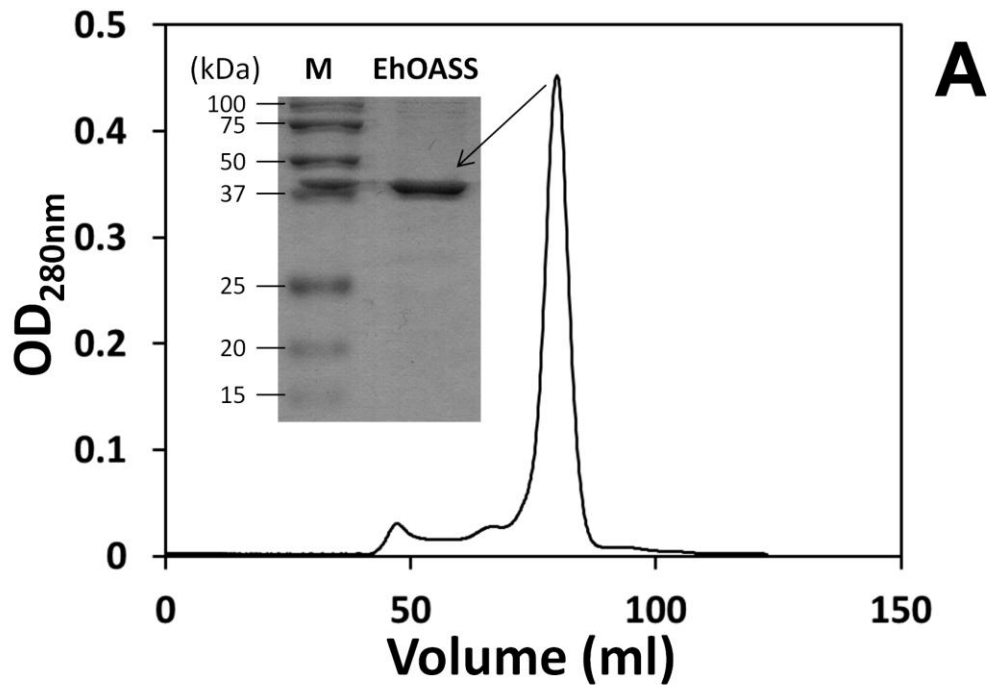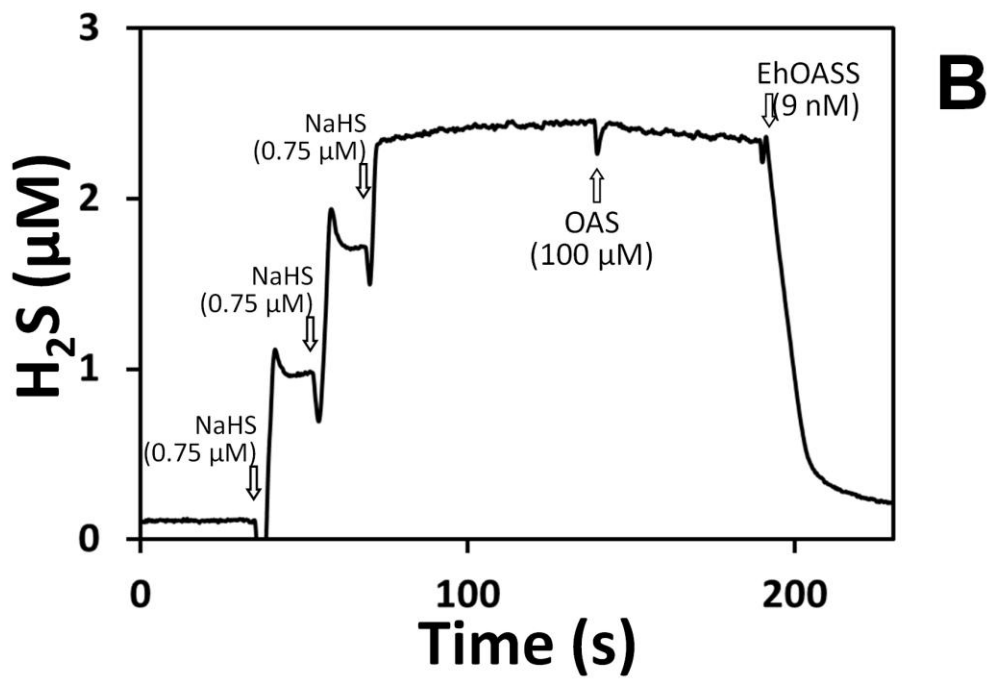

Figure S1
